# Supplementary material for: Analysis of the Properties of 44 ABC Transporter Genes from Biocontrol Agent Trichoderma asperellum ACCC30536 and Their Responses to Pathogenic Alternaria alternata Toxin Stress
Source: MDPI journal article supplement (doi:10.3390/cimb45020101), 2023-02-12
Supplement: s1 [file s1]

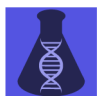Table S1 Properties of the 44 ABC transporters in *Trichoderma asperellum*.

| Gene name     | Location of gene on chromosome | Protein ID | N | NI | AA  | pI  | MW (kDa) | AO CD | Multidomain in | Conserved Domain                    |
|---------------|--------------------------------|------------|---|----|-----|-----|----------|-------|----------------|-------------------------------------|
| <i>ABC 01</i> | scaf-fold_5:1330229-1335406(+) | 26122      | 2 | 1  | 169 | 5.8 | 187.56   | A-B   | MRP            | 324-659,707-933,1156-1356,1403-1660 |
| <i>ABC 02</i> | scaf-fold_3:1602050-1606909(-) | 24492      | 1 | 0  | 161 | 8.9 | 176.23   | B-C-B | Rim protein    | 471-694,1016-1137,1267-1482         |
| <i>ABC 03</i> | scaf-fold_6:1245891-1250899(+) | 57754      | 1 | 0  | 160 | 7.1 | 174.31   | B-E-B | Rim protein    | 464-687,1003-1154,1250-1465         |
| <i>ABC 04</i> | scaf-fold_7:566523-571800(+)   | 19355      | 4 | 3  | 158 | 6.0 | 174.09   | A-B   | CFTR           | 418-584,630-858,1033-1265,1153-1309 |
| <i>ABC 05</i> | scaf-fold_15:669827-674943(+)  | 51252      | 4 | 3  | 115 | 7.6 | 173.56   | A-B   | MRP            | 317-590,638-840,988-                |

|           |                 |            |    |    |          |          |            |     |      |              |
|-----------|-----------------|------------|----|----|----------|----------|------------|-----|------|--------------|
| ABC<br>06 | scaf-           | 17375<br>0 | 5  | 4  | 156<br>6 | 5.<br>79 | 172.<br>37 | A-  | MdlB | 1257,1304-   |
|           | fold_11:638450- |            |    |    |          |          |            | B-  |      | 1537         |
|           | 643615(+)       |            |    |    |          |          |            | A-B |      | 291-582,621- |
| ABC<br>07 | scaf-           | 15993<br>0 | 3  | 2  | 125<br>0 | 6.<br>12 | 168.<br>32 | A-  | CFTR | 845,1010-    |
|           | fold_2:2877202- |            |    |    |          |          |            | B-  |      | 1253,1295-   |
|           | 2882351(+)      |            |    |    |          |          |            | A-B |      | 1539         |
| ABC<br>08 | scaf-           | 59384      | 15 | 14 | 152<br>8 | 5.<br>91 | 167.<br>1  | A-  | CFTR | 315-582,627- |
|           | fold_9:637077-  |            |    |    |          |          |            | B-  |      | 827,921-     |
|           | 643406(-)       |            |    |    |          |          |            | A-B |      | 1161,1249-   |
| ABC<br>09 | scaf-           | 38146      | 3  | 2  | 143<br>9 | 9.<br>75 | 164.<br>8  | A-  | MRP  | 1494         |
|           | fold_8:1749604- |            |    |    |          |          |            | B-  |      | 281-556,657- |
|           | 1754389(+)      |            |    |    |          |          |            | A-B |      | 855,946-     |
| ABC<br>10 | scaf-           | 45774<br>6 | 15 | 14 | 149<br>3 | 5.<br>92 | 163.<br>86 | A-  | MRP  | 1193,1280-   |
|           | fold_6:1669360- |            |    |    |          |          |            | B-  |      | 1511         |
|           | 1674235(-)      |            |    |    |          |          |            | A-B |      | 295-431,599- |

[illegible]

[illegible]

|     |    |                  |       |    |    |     |    |      |     |     |               |
|-----|----|------------------|-------|----|----|-----|----|------|-----|-----|---------------|
| ABC | 21 | scaf-            | 13950 |    |    | 133 | 6. | 146. | A-  |     | 104-385,432-  |
|     |    | fold_6:623567-   |       | 1  | 0  |     |    |      | B-  | MDR | 678,769-      |
|     |    | 627580(-)        | 4     |    |    | 7   | 41 | 39   | A-B |     | 1048,1097-    |
|     |    |                  |       |    |    |     |    |      |     |     | 1335          |
| ABC | 22 | scaf-            | 15439 |    |    | 133 | 6. | 146. | A-  |     | 102-381,429-  |
|     |    | fold_29:17508-   |       | 3  | 2  |     |    |      | B-  | MDR | 674,773-      |
|     |    | 21673(+)         | 5     |    |    | 7   | 49 | 11   | A-B |     | 1052,1096-    |
|     |    |                  |       |    |    |     |    |      |     |     | 1335          |
| ABC | 23 | scaf-            |       |    |    | 131 | 6. | 144. | A-  |     | 66-347,392-   |
|     |    | fold_1:2903039-  | 64176 | 12 | 11 |     |    |      | B-  | MDR | 683,749-      |
|     |    | 2907805(+)       |       |    |    | 0   | 2  | 84   | A-B |     | 1019,1072-    |
|     |    |                  |       |    |    |     |    |      |     |     | 1310          |
| ABC | 24 | scaf-            |       |    |    | 128 | 5. | 140. | A-  |     | 80-342,393-   |
|     |    | fold_11:1091827- | 60557 | 9  | 8  |     |    |      | B-  | MDR | 638,716-      |
|     |    | 1096466(+)       |       |    |    | 9   | 97 | 56   | A-B |     | 990,1039-1290 |
| ABC | 25 | scaf-            | 15524 |    |    | 126 | 6. | 138. | A-  |     | 71-327,372-   |
|     |    | fold_1:100127-   |       | 11 | 10 |     |    |      | B-  | MDR | 635,704-      |
|     |    | 104858(-)        | 4     |    |    | 1   | 67 | 37   | A-B |     | 974,1027-1261 |
| ABC | 26 | scaf-            | 39525 |    |    | 128 | 6. | 138. | A-  |     | 45-270,325-   |
|     |    | fold_6:108438-   |       | 3  | 2  |     |    |      | B-  | MDR | 605,697-      |
|     |    | 112752(+)        | 9     |    |    | 0   | 33 | 01   | A-B |     | 968,1041-1281 |

|     |                 |       |   |   |     |    |      |          |               |
|-----|-----------------|-------|---|---|-----|----|------|----------|---------------|
| ABC | scaf-           |       |   |   |     |    | A-   |          | 47-326,373-   |
|     | fold_8:1063376- | 19553 |   |   | 127 | 6. | 137. |          |               |
|     | 27              |       | 5 | 4 |     |    |      |          |               |
|     | 1067657(+)      | 0     |   |   | 5   | 36 | 75   | B- MDR   | 619,700-      |
|     |                 |       |   |   |     |    |      | A-B      | 981,1037-1276 |
| ABC | scaf-           |       |   |   |     |    |      | A-       | 95-357,400-   |
|     | fold_6:298511-  | 13842 |   |   | 126 | 5. | 137. |          |               |
|     | 28              |       | 7 | 6 |     |    |      | B- CFTR  | 596,693-      |
|     | 302824(+)       | 7     |   |   | 6   | 83 | 13   |          |               |
|     |                 |       |   |   |     |    |      | A-B      | 899,1009-1234 |
| ABC | scaf-           |       |   |   |     |    |      |          |               |
|     | fold_6:792799-  | 19227 |   |   | 111 | 6. | 122. |          | 488-676,727-  |
|     | 29              |       | 2 | 1 |     |    |      | B-B UuP  |               |
|     | 796903(-)       | 5     |   |   | 3   | 2  | 48   |          | 1021          |
| ABC | scaf-           |       |   |   |     |    |      | Pro-     |               |
|     | fold_12:686978- |       |   |   | 107 | 5. | 117. |          | 369-596,808-  |
|     | 30              | 60895 | 4 | 3 |     |    |      | B-C tein |               |
|     | 690799(-)       |       |   |   | 7   | 48 | 17   |          | 1018          |
|     |                 |       |   |   |     |    |      | white    |               |
| ABC | scaf-           |       |   |   |     |    |      |          |               |
|     | fold_4:2162032- |       |   |   | 105 | 5. | 117. | B-       | 446-632,682-  |
|     | 31              | 35803 | 3 | 2 |     |    |      |          | UuP           |
|     | 2166124(+)      |       |   |   | 5   | 77 | 13   | B-B      | 985,713-795   |
| ABC | scaf-           |       |   |   |     |    |      |          |               |
|     | fold_6:571499-  |       |   |   |     | 9. | 110. |          | 360-637,683-  |
|     | 32              | 46574 | 3 | 2 | 966 |    |      | A-B ATM1 |               |
|     | 574783(+)       |       |   |   |     | 87 | 08   |          | 918           |
| ABC | scaf-           |       |   |   |     |    |      |          |               |
|     | fold_4:2335986- |       |   |   |     | 8. | 103. |          | 284-553,599-  |
|     | 33              | 67305 | 7 | 6 | 935 |    |      | A-B MdlB |               |
|     | 2339176(+)      |       |   |   |     | 26 | 06   |          | 834           |

|     |                 |       |   |   |     |    |      |     |       |       |              |
|-----|-----------------|-------|---|---|-----|----|------|-----|-------|-------|--------------|
| ABC | scaf-           |       |   |   |     |    |      |     |       |       |              |
|     | fold_17:462008- | 51699 | 1 | 0 | 806 | 9. | 86.9 | A-B | MdlB  |       | 188-456,510- |
|     | 34              |       |   |   |     | 43 | 3    |     |       |       | 749          |
|     | 464428(-)       |       |   |   |     |    |      |     |       |       |              |
| ABC | scaf-           |       |   |   |     |    |      |     |       |       |              |
|     | fold_4:404984-  | 55941 | 3 | 2 | 749 | 5. | 82.7 | B-  |       |       | 201-442,436- |
|     | 35              |       |   |   |     | 71 | 2    | D-B | UuP   |       | 522,553-725  |
|     | 407606(-)       |       |   |   |     |    |      |     |       |       |              |
| ABC | scaf-           |       |   |   |     |    |      |     | B-    |       | 83-161,262-  |
|     | fold_2:2113968- | 12909 |   |   |     | 5. | 81.8 |     |       |       |              |
|     | 36              |       | 5 | 4 | 737 | 92 | 6    | B-  | UuP   |       | 365,361-     |
|     | 2116435(+)      | 7     |   |   |     |    |      | D-B |       |       | 432,489-684  |
| ABC | scaf-           |       |   |   |     |    |      |     |       |       |              |
|     | fold_1:3104696- | 12757 |   |   |     | 9. | 81.0 |     | 3a012 |       | 90-371,468-  |
|     | 37              |       | 4 | 3 | 710 | 41 | 1    | A-B |       |       | 674          |
|     | 3107034(+)      | 2     |   |   |     |    |      |     | 3     |       |              |
| ABC | scaf-           |       |   |   |     |    |      |     |       |       |              |
|     | fold_3:1180302- | 16106 |   |   |     | 9. | 79.6 |     |       |       | 146-422,469- |
|     | 38              |       | 2 | 1 | 728 | 4  | 1    | A-B | ATM1  |       | 706          |
|     | 1182933(-)      | 3     |   |   |     |    |      |     |       |       |              |
| ABC | scaf-           |       |   |   |     |    |      |     |       |       |              |
|     | fold_25:29785-  | 84850 | 2 | 1 | 655 | 5. | 73.8 |     |       |       | 174-375,421- |
|     | 39              |       |   |   |     | 93 | 3    | A-B | ATM1  |       | 656          |
|     | 32063(+)        |       |   |   |     |    |      |     |       |       |              |
| ABC | scaf-           |       |   |   |     |    |      |     |       | Pro-  |              |
|     | fold_16:47359-  | 15150 |   |   |     | 7. | 69.7 |     |       |       | 34-266,356-  |
|     | 40              |       | 3 | 2 | 631 |    |      | B-C | tein  |       | 564          |
|     | 49428(-)        | 8     |   |   |     | 2  | 6    |     |       | white |              |

|     |                   |       |   |   |     |    |      |     |       |              |
|-----|-------------------|-------|---|---|-----|----|------|-----|-------|--------------|
| ABC | scaffold_43:7456- | 15487 |   |   |     | 8. | 69.5 |     | Pro-  | 25-253,342-  |
| 41  | 9454(+)           | 2     | 3 | 2 | 619 | 14 | 6    | B-C | tein  | 545          |
|     |                   |       |   |   |     |    |      |     | white |              |
| ABC | scaf-             |       |   |   |     | 6. | 69.0 | B-  |       | 88-306,304-  |
| 42  | fold_17:13345-    | 31428 | 3 | 2 | 620 | 17 | 9    | D-B | UuP   | 392,399-595  |
|     | 15352(-)          |       |   |   |     |    |      |     |       |              |
| ABC | scaf-             |       |   |   |     | 9. | 66.0 |     |       | 109-325,376- |
| 43  | fold_16:35781-    | 73462 | 5 | 4 | 616 | 37 | 5    | A-B | MdlB  | 619          |
|     | 38167(+)          |       |   |   |     |    |      |     |       |              |
| ABC | scaf-             | 14307 |   |   |     | 8. | 55.3 |     |       | 11-196,250-  |
| 44  | fold_8:1897631-   |       | 5 | 4 | 491 | 79 | 3    | A-B | ATM1  | 483          |
|     | 1899321(-)        | 7     |   |   |     |    |      |     |       |              |

Note: NE: Number of exon; NI: Number of intron; AA: Number of amino acids; pI: Isoelectric poin; MW: molecular weight; AOCD: Arrangement of conserved domain.
